# Supplementary material
Source: PubMed Central journal article supplement (PMC7029703)
Supplement: NIHMS1523936-supplement-Sup_1.pdf [file NIHMS1523936-supplement-Sup_1.pdf]

**SUPPLEMENTAL INFORMATION FOR:**

**Greenhouse gas emissions from lakes and impoundments: upscaling  
in the face of global change**

**Tonya DelSontro<sup>1‡</sup>, J. J. Beaulieu<sup>2‡</sup>, John A. Downing<sup>3</sup>**

1. Groupe de Recherche Interuniversitaire en Limnologie (GRIL), Département des sciences biologiques, Université du Québec à Montréal, Case postale 8888, succ. Centre-Ville, Montréal, QC, H3C 3P8 Canada

2. United States Environmental Protection Agency, Office of Research and Development, Cincinnati, Ohio, 45268 USA

3. University of Minnesota, Minnesota Sea Grant and Large Lakes Observatory, Duluth, Minnesota, USA

\*Corresponding author: [tdelsontro@gmail.com](mailto:tdelsontro@gmail.com)

‡These two authors made approximately equal contributions to the manuscript

**Note 1:** Manuscript published March 2018 in *Limnology & Oceanography Letters* and found at <https://doi.org/10.1002/lol2.10073>

**Note 2:** Full supplementary dataset can be found online at <https://doi.org/10.6084/m9.figshare.5220001> under 'siData.csv'

**Table S1.** Source references for data used in this study. These references are also available as an Excel file at <https://doi.org/10.6084/m9.figshare.5220001> ("Table S1-SI-reference-list.xlsx").

| Full Citation for Data Source                                                                                                                                                                                                                           | Metadata                         |
|---------------------------------------------------------------------------------------------------------------------------------------------------------------------------------------------------------------------------------------------------------|----------------------------------|
| Åberg, J., Bergström, A.-K., Algesten, G., Söderback, K. & Jansson, M. A comparison of the carbon balances of a natural lake (L. Örträsket) and a hydroelectric reservoir (L. Skinnmuddselet) in northern Sweden. <i>Water Res.</i> 38, 531–538 (2004). | Reported in Deemer et al. (2016) |

| Full Citation for Data Source                                                                                                                                                                                                                                                                                                                                                                                                     | Metadata                                                                                                               |
|-----------------------------------------------------------------------------------------------------------------------------------------------------------------------------------------------------------------------------------------------------------------------------------------------------------------------------------------------------------------------------------------------------------------------------------|------------------------------------------------------------------------------------------------------------------------|
| Abril, G. et al. Carbon dioxide and methane emissions and the carbon budget of a 10-year old tropical reservoir (Petit Saut, French Guiana). <i>Glob. Biogeochem. Cycles</i> 19, GB4007 (2005).                                                                                                                                                                                                                                   | Reported in Deemer et al. (2016)                                                                                       |
| Adamczyk, E.M. & Shurin, J.B. Seasonal changes in plankton food web structure and carbon dioxide flux from southern California reservoirs. <i>PLoS ONE</i> 10, 1-20 (2015).                                                                                                                                                                                                                                                       | Reported in Deemer et al. (2016)                                                                                       |
| Aladin, N. V., Filippov, A. A., Plotnikov, I. S., Orlova, M. I., & Williams, W. D. (1998). Changes in the structure and function of biological communities in the Aral Sea, with particular reference to the northern part (Small Aral Sea), 1985-1994: A review. <i>International Journal of Salt Lake Research</i> , 7(4), 301–343. <a href="http://doi.org/10.1023/A:1009009924839">http://doi.org/10.1023/A:1009009924839</a> | Used for nutrient or chlorophyll data in large lakes                                                                   |
| Algesten, G., Sobek, S., Bergström, A.-K., Jonsson, A., Tranvik, L. J., & Jansson, M. (2005). Contribution of sediment respiration to summer CO <sub>2</sub> emission from low productive boreal and subarctic lakes. <i>Microbial Ecology</i> , 50(4), 529–35. <a href="http://doi.org/10.1007/s00248-005-5007-x">http://doi.org/10.1007/s00248-005-5007-x</a>                                                                   |                                                                                                                        |
| Alin, S. R., & Johnson, T. C. (2007). Carbon cycling in large lakes of the world: A synthesis of production, burial, and lake-atmosphere exchange estimates. <i>Global Biogeochemical Cycles</i> , 21(3), 1–12. <a href="http://doi.org/10.1029/2006GB002881">http://doi.org/10.1029/2006GB002881</a>                                                                                                                             | Used data compiled for this study; Converted annual flux to daily flux; TP data found independently from sources below |
| Almeida, R.M. et al. High primary production contrasts with intense carbon emission in a eutrophic tropical reservoir. <i>Front. Microbiol.</i> 7, 1-13 (2016).                                                                                                                                                                                                                                                                   | Reported in Deemer et al. (2016)                                                                                       |
| Alshboul, Z. & Lorke, A. Carbon dioxide emissions from reservoirs in the lower Jordan Watershed. <i>PLoS ONE</i> 10, 1-18 (2015).                                                                                                                                                                                                                                                                                                 | Reported in Deemer et al. (2016)                                                                                       |
| Andrade, G. de S. D. Greenhouse gas emission (GHG) and atmospheric impacts accrue from hydroelectricity production: Case study of Volta Grande hydropower plant. (Unviuersidade Federal de Minas Gerais PhD Thesis, 2014).                                                                                                                                                                                                        | Reported in Deemer et al. (2016)                                                                                       |
| Bansal, S., Chakraborty, M., Katyal, D. & Garg, J. K. Methane flux from a subtropical reservoir located in the floodplains of river Yamuna, India. <i>Appl. Ecol. Environ. Res.</i> 13, (2015).                                                                                                                                                                                                                                   | Reported in Deemer et al. (2016)                                                                                       |
| Barlow, G. W., et al. (1976). Chemical analyses of some crater lakes in relation to adjacent Lake Nicaragua, in <i>Investigations of the Ichthyofauna of Nicaraguan Lakes</i> , edited by T. B. Thorson, pp. 17-20, School of Life Sciences, Lincoln, Nebraska.                                                                                                                                                                   | Reported in Alin and Johnson (2007)                                                                                    |
| Barros, N. et al. Carbon emission from hydroelectric reservoirs linked to reservoir age and latitude. <i>Nat. Geosci.</i> 4, 593–596 (2011).                                                                                                                                                                                                                                                                                      | Reported in Deemer et al. (2016)                                                                                       |
| Bastien, J., Tremblay, A. & LeDrew, L. Greenhouse gases fluxes from Smallwood Reservoir and natural water bodies in Labrador, Newfoundland, Canada. <i>Verhandlungen Int. Ver. Theor. Angew. Limnol.</i> 30, 858–861 (2009).                                                                                                                                                                                                      | Reported in Deemer et al. (2016)                                                                                       |

| Full Citation for Data Source                                                                                                                                                                                                                            | Metadata                                                                                                  |
|----------------------------------------------------------------------------------------------------------------------------------------------------------------------------------------------------------------------------------------------------------|-----------------------------------------------------------------------------------------------------------|
| Bastien, J., Tremblay, A. & Scanlon, A. CO <sub>2</sub> and CH <sub>4</sub> fluxes from Tasmanian aquatic systems, Australia. <i>Verh. Int. Ver. Limnol.</i> 30, 854–857 (2009).                                                                         | Reported in Deemer et al. (2016)                                                                          |
| Bastviken, D., Cole, J., Pace, M., & Tranvik, L. (2004). Methane emissions from lakes: Dependence of lake characteristics, two regional assessments, and a global estimate. <i>Global Biogeochemical Cycles</i> , 18(4), 1–12, doi:10.1029/2004GB002238. | Used data compiled in Table 1 of this study; Was in contact with for individual flux and/or variable data |
| Bastviken, D., Ejlertsson, J., & Tranvik, L. (2002). Measurement of methane oxidation in lakes: a comparison of methods. <i>Environmental Science &amp; Technology</i> , 36(15), 3354–61, doi:10.1021/es010311.                                          | Reported in Bastviken et al. (2004)                                                                       |
| Bauerle, E., et al. (1998). Some meteorological, hydrological, and hydrodynamical aspects of Upper Lake Constance, <i>Ergebnisse der Limnologie</i> , 53, 31-83.                                                                                         | Reported in Alin and Johnson (2007)                                                                       |
| Beaulieu et al. (2017) unpublished data                                                                                                                                                                                                                  |                                                                                                           |
| Beaulieu, J. J. et al. Denitrification alternates between a source and sink of nitrous oxide in the hypolimnion of a thermally stratified reservoir. <i>Limnol. Oceanogr.</i> 59, 495–506 (2014).                                                        | Reported in Deemer et al. (2016)                                                                          |
| Beaulieu, J. J., Smolenski, R. L., Nietch, C. T., Townsend-Small, A. & Elovitz, M. S. High methane emissions from a midlatitude reservoir draining an agricultural watershed. <i>Environ. Sci. Technol.</i> 48, 11100–11108 (2014).                      | Reported in Deemer et al. (2016)                                                                          |
| Bell, G. L. (1980a). Eastern Lake Superior chemical and physical characteristics data for 1968, NOAA Data Report, Great Lakes Environmental Research Laboratory, Ann Arbor.                                                                              | Reported in Alin and Johnson (2007)                                                                       |
| Bell, G. L. (1980b). Lake Ontario chemical and physical characteristics data for 1972, NOAA Data Report, Great Lakes Environmental Research Laboratory, Ann Arbor.                                                                                       | Reported in Alin and Johnson (2007)                                                                       |
| Bell, G. L. (1980c). Northern Lake Michigan chemical and physical characteristics data for 1970, NOAA Data Report, Great Lakes Environmental Research Laboratory, Ann Arbor.                                                                             | Reported in Alin and Johnson (2007)                                                                       |
| Bell, G. L. (1980d). Western Lake Superior chemical and physical characteristics data for 1969, NOAA Data Report, Great Lakes Environmental Research Laboratory, Ann Arbor.                                                                              | Reported in Alin and Johnson (2007)                                                                       |
| Bergier, I., Novo, E. M. L. M., Ramos, F. M., Mazzi, E. A. & Rasera, M. F. F. L. Carbon dioxide and methane fluxes in the littoral zone of a tropical savanna reservoir (Corumbá, Brazil). <i>Oecologia Aust.</i> 15, 666–681 (2011).                    | Reported in Deemer et al. (2016)                                                                          |
| Bergström, A.-K., Algesten, G., Sobek, S., Tranvik, L. & Jansson, M. Emission of CO <sub>2</sub> from hydroelectric reservoirs in northern Sweden. <i>Arch. Hydrobiol.</i> 159, 25–42 (2004).                                                            | Reported in Deemer et al. (2016)                                                                          |
| Bevelhimer, M.S., Stewart, A.J., Fortner, A.M., Phillips, J.R. & Mosher, J.J. CO <sub>2</sub> is dominant greenhouse gas emitted from six hydropower reservoirs in southeastern United State during peak summer emissions. <i>Water</i> 8, 1-14 (2016).  | Reported in Deemer et al. (2016)                                                                          |

| Full Citation for Data Source                                                                                                                                                                                                                                                                                                                                | Metadata                                             |
|--------------------------------------------------------------------------------------------------------------------------------------------------------------------------------------------------------------------------------------------------------------------------------------------------------------------------------------------------------------|------------------------------------------------------|
| Blackie, C. T., Weese, D. J., & Noakes, D. L. G. (2003). Evidence for resource polymorphism in the lake charr ( <i>Salvelinus namaycush</i> ) population of Great Bear Lake, Northwest Territories, Canada. <i>Écoscience</i> , 10(4), 509–514.<br><a href="http://doi.org/10.1080/11956860.2003.11682799">http://doi.org/10.1080/11956860.2003.11682799</a> | Used for nutrient or chlorophyll data in large lakes |
| Brothers, S. M., del Giorgio, P. A., Teodoru, C. R., Prairie, Y. T. & Smith, R. Landscape heterogeneity influences carbon dioxide production in a young boreal reservoir. <i>Can. J. Fish. Aquat. Sci.</i> 69, 447–456 (2012).                                                                                                                               | Reported in Deemer et al. (2016)                     |
| Carmouze, J.-P., and J. Lemoalle (1983). The lacustrine environment, in <i>Lake Chad: Ecology and Productivity of a Shallow Tropical Ecosystem</i> , edited by J.-P. Carmouze, et al., pp. 27-64, Dr. W. Junk Publishers, The Hague.                                                                                                                         | Reported in Alin and Johnson (2007)                  |
| Carmouze, J.-P., et al. (1983). Physical and chemical characteristics of the waters, in <i>Lake Chad: Ecology and Productivity of a Shallow Tropical Ecosystem</i> , edited by J.-P. Carmouze, et al., pp. 65-94, Dr. W. Junk Publishers, Boston.                                                                                                            | Reported in Alin and Johnson (2007)                  |
| Casper, P., Maberly, S. C., Hall, G. H., & Finlay, B. J. (2000). Fluxes of methane and carbon dioxide from a small productive lake to the atmosphere. <i>Biogeochemistry</i> , 49(1), 1–19.                                                                                                                                                                  | Reported in Bastviken et al. (2004)                  |
| Castillo, I., Guerra, N., Caicedo, M., Prieto, M., Soto, L., Soto, L., & Lopez, C. (2015). Abundance of Planktonic Nanoflagellates and their relationship with physical and chemical factors in the strait of lake maracaibo. <i>CIENCIA</i> , 23(4), 172–180.                                                                                               | Used for nutrient or chlorophyll data in large lakes |
| Chale, F. M. M. (2004). Inorganic nutrient concentrations and chlorophyll in the euphotic zone of Lake Tanganyika. <i>Hydrobiologia</i> , 523(1–3), 189–197.<br><a href="http://doi.org/10.1023/B:HYDR.0000033125.87313.53">http://doi.org/10.1023/B:HYDR.0000033125.87313.53</a>                                                                            | Used for nutrient or chlorophyll data in large lakes |
| Chanudet, V. et al. Gross CO <sub>2</sub> and CH <sub>4</sub> emissions from the Nam Ngum and Nam Leuk sub-tropical reservoirs in Lao PDR. <i>Sci. Total Environ.</i> 409, 5382–5391 (2011).                                                                                                                                                                 | Reported in Deemer et al. (2016)                     |
| Chapra, S. C., & Dolan, D. M. (2012). Great Lakes total phosphorus revisited: 2. Mass balance modeling. <i>Journal of Great Lakes Research</i> , 38(4), 741–754.<br><a href="http://doi.org/10.1016/j.jglr.2012.10.002">http://doi.org/10.1016/j.jglr.2012.10.002</a>                                                                                        | Used for nutrient or chlorophyll data in large lakes |
| Chau, Y. K., et al. (1977). Sampler for collecting evolved gases from sediment. <i>Water Research</i> 11(9): 807-809                                                                                                                                                                                                                                         | Reported in Bastviken et al. (2004)                  |
| Chavula, G., Brezonik, P., Thenkabail, P., Johnson, T., & Bauer, M. (2009). Estimating chlorophyll concentration in Lake Malawi from MODIS satellite imagery. <i>Physics and Chemistry of the Earth</i> , 34(13–16), 755–760.<br><a href="http://doi.org/10.1016/j.pce.2009.07.015">http://doi.org/10.1016/j.pce.2009.07.015</a>                             | Used for nutrient or chlorophyll data in large lakes |
| Chen, H. et al. Methane emissions from the surface of the Three Gorges Reservoir. <i>J. Geophys. Res.</i> 116, D21306 (2011).                                                                                                                                                                                                                                | Reported in Deemer et al. (2016)                     |

| Full Citation for Data Source                                                                                                                                                                                                                                                              | Metadata                                                                                                        |
|--------------------------------------------------------------------------------------------------------------------------------------------------------------------------------------------------------------------------------------------------------------------------------------------|-----------------------------------------------------------------------------------------------------------------|
| Chen, H., et al. (2011). Nitrous oxide fluxes from the littoral zone of a lake on the Qinghai-Tibetan Plateau. <i>Environmental Monitoring and Assessment</i> 182(1-4): 545-553.                                                                                                           |                                                                                                                 |
| Chen, N., Chen, Z., Wu, Y. & Hu, A. Understanding gaseous nitrogen removal through direct measurement of dissolved N <sub>2</sub> and N <sub>2</sub> O in a subtropical river-reservoir system. <i>Ecol. Eng.</i> 70, 56–67 (2014).                                                        | Reported in Deemer et al. (2016)                                                                                |
| Deemer, B. R., Harrison, J. A. & Whitling, E. W. Microbial dinitrogen and nitrous oxide production in a small eutrophic reservoir: An in situ approach to quantifying hypolimnetic process rates. <i>Limnol. Oceanogr.</i> 56, 1189–1199 (2011).                                           | Reported in Deemer et al. (2016)                                                                                |
| Deemer, B. R., Harrison, J. A., Li, S., Beaulieu, J. J., DelSontro, T., Barros, N., ... Vonk, J. A. (2016). Greenhouse Gas Emissions from Reservoir Water Surfaces: A New Global Synthesis. <i>BioScience</i> , 66(11), 949–964; doi:10.1093/biosci/biw117.                                | Used impoundment data compiled for this synthesis; Was in contact with for individual flux and/or variable data |
| DelSontro, T. et al. Spatial heterogeneity of methane ebullition in a large tropical reservoir. <i>Environ. Sci. Technol.</i> 45, 9866–9873 (2011).                                                                                                                                        | Reported in Deemer et al. (2016)                                                                                |
| DelSontro, T., McGinnis, D. F., Sobek, S., Ostrovsky, I. & Wehrli, B. Extreme methane emissions from a Swiss hydropower reservoir: contribution from bubbling sediments. <i>Environ. Sci. Technol.</i> 44, 2419–2425 (2010).                                                               | Reported in Deemer et al. (2016)                                                                                |
| Demarty, M., Bastien, J. & Tremblay, A. Annual follow-up of gross diffusive carbon dioxide and methane emissions from a boreal reservoir and two nearby lakes in Québec, Canada. <i>Biogeosciences</i> 8, 41–53 (2011).                                                                    | Reported in Deemer et al. (2016)                                                                                |
| Demarty, M., Bastien, J., Tremblay, A., Hesslein, R. H. & Gill, R. Greenhouse gas emissions from boreal reservoirs in Manitoba and Québec, Canada, measured with automated systems. <i>Environ. Sci. Technol.</i> 43, 8908–8915 (2009).                                                    | Reported in Deemer et al. (2016)                                                                                |
| Deshmukh, C. et al. Physical controls on CH <sub>4</sub> emissions from a newly flooded subtropical freshwater hydroelectric reservoir: Nam Theun 2. <i>Biogeosciences</i> 11, 4251–4269 (2014).                                                                                           | Reported in Deemer et al. (2016)                                                                                |
| Deshmukh, C. Greenhouse gas emissions (CH <sub>4</sub> , CO <sub>2</sub> and N <sub>2</sub> O) from a newly flooded hydroelectric reservoir in subtropical South Asia: The case of Nam Theun 2 Reservoir, Lao PDR. (Université Paul Sabatier- Toulouse III PhD Thesis, 2013).              | Reported in Deemer et al. (2016)                                                                                |
| Diem, T., Koch, S., Schwarzenbach, S., Wehrli, B. & Schubert, C. J. Greenhouse gas emissions (CO <sub>2</sub> , CH <sub>4</sub> , and N <sub>2</sub> O) from several perialpine and alpine hydropower reservoirs by diffusion and loss in turbines. <i>Aquat. Sci.</i> 74, 619–635 (2012). | Reported in Deemer et al. (2016)                                                                                |
| Domagalski, J. L., et al. (1989). Organic geochemistry and brine composition in Great Salt, Mono, and Walker Lakes, <i>Geochimica et Cosmochimica Acta</i> , 53, 2857-2872.                                                                                                                | Reported in Alin and Johnson (2007)                                                                             |

| Full Citation for Data Source                                                                                                                                                                                                                                                                                                                          | Metadata                                                             |
|--------------------------------------------------------------------------------------------------------------------------------------------------------------------------------------------------------------------------------------------------------------------------------------------------------------------------------------------------------|----------------------------------------------------------------------|
| Dos Santos, M. A., Rosa, L. P., Sikar, B., Sikar, E. & dos Santos, E. O. Gross greenhouse gas fluxes from hydro-power reservoir compared to thermo-power plants. <i>Energy Policy</i> 34, 481–488 (2006).                                                                                                                                              | Reported in Deemer et al. (2016)                                     |
| Downes, M. T. (1991). The Production and Consumption of Nitrate in an Eutrophic Lake during Early Stratification. <i>Archiv Fur Hydrobiologie</i> 122(3): 257-274.                                                                                                                                                                                     |                                                                      |
| Duarte, C. M., Prairie, Y. T., Montes, C., Cole, J. J., Striegl, R., Melack, J., & Downing, J. A. (2008). CO2 emissions from saline lakes: A global estimate of a surprisingly large flux. <i>Journal of Geophysical Research: Biogeosciences</i> , 113(4), 1–7. <a href="http://doi.org/10.1029/2007JG000637">http://doi.org/10.1029/2007JG000637</a> | Was in contact with authors for individual flux and/or variable data |
| Duchemin, É. et al. Comparison of greenhouse gas emissions from an old tropical reservoir with those from other reservoirs worldwide. <i>Verhandlungen Int. Ver. Theor. Angew.</i> 27, 1391–1395 (2000).                                                                                                                                               | Reported in Deemer et al. (2016)                                     |
| Duchemin, É., Lucotte, M., Canuel, R. & Chamberland, A. Production of the greenhouse gases CH4 and CO2 by hydroelectric reservoirs of the boreal region. <i>Glob. Biogeochem. Cycles</i> 9, 529–540 (1995).                                                                                                                                            | Reported in Deemer et al. (2016)                                     |
| Edmond, J. M., et al. (1993). Nutrient chemistry of the water column of Lake Tanganyika, <i>Limnology and Oceanography</i> , 38, 725-738.                                                                                                                                                                                                              | Reported in Alin and Johnson (2007)                                  |
| Eugster, W., DelSontro, T. & Sobek, S. Eddy covariance flux measurements confirm extreme CH4 emissions from a Swiss hydropower reservoir and resolve their short-term variability. <i>Biogeosciences</i> 8, 2815–2831 (2011).                                                                                                                          | Reported in Deemer et al. (2016)                                     |
| Fallon, R. D., Harrits, S., Hanson, R. S., & Brock, T. D. (1980). The role of methane in internal carbon cycling in Lake Mendota during summer stratification. <i>Limnology and Oceanography</i> , 25(2), 357–360. <a href="http://doi.org/10.4319/lo.1980.25.2.0357">http://doi.org/10.4319/lo.1980.25.2.0357</a>                                     | Reported in Bastviken et al. (2004)                                  |
| Fedorov, M.P. et al. Reservoir greenhouse gas emissions at Russian HPP. <i>Power Technology and Engineering</i> 49, 33-39 (2015).                                                                                                                                                                                                                      | Reported in Deemer et al. (2016)                                     |
| Finlay, K., Vogt, R. J., Bogard, M. J., Wissel, B., Tutolo, B. M., Simpson, G. L., & Leavitt, P. R. (2015). Decrease in CO2 efflux from northern hardwater lakes with increasing atmospheric warming. <i>Nature</i> , 8. <a href="http://doi.org/10.1038/nature14172">http://doi.org/10.1038/nature14172</a>                                           | Was in contact with authors for individual flux and/or variable data |
| Fish, C. J., and Associates (1960). <i>Limnological Survey of Eastern and Central Lake Erie</i> , United States Fish and Wildlife Service, Washington, D.C.                                                                                                                                                                                            | Reported in Alin and Johnson (2007)                                  |
| Forsyth et al. (1998). The Lake Okaro ecosystem 1. Background Limnology <i>New Zealand Journal of Marine and Freshwater Research</i> . for morphometry.                                                                                                                                                                                                |                                                                      |
| Frumin, G. T., et al. (1996). Lake Ladoga: chemical pollution and biochemical self-purification, <i>Hydrobiologia</i> , 322, 143-147.                                                                                                                                                                                                                  | Reported in Alin and Johnson (2007)                                  |

| Full Citation for Data Source                                                                                                                                                                                                                                                                                                                                        | Metadata                                             |
|----------------------------------------------------------------------------------------------------------------------------------------------------------------------------------------------------------------------------------------------------------------------------------------------------------------------------------------------------------------------|------------------------------------------------------|
| Goldman, C. R. (1988). Primary productivity, nutrients, and transparency during the early onset of eutrophication in ultra-oligotrophic Lake Tahoe, California-Nevada. <i>Limnology and Oceanography</i> , 33(6), 1321–1333.<br><a href="http://doi.org/10.4319/lo.1988.33.6.1321">http://doi.org/10.4319/lo.1988.33.6.1321</a>                                      | Used for nutrient or chlorophyll data in large lakes |
| Goldman, C. R. (1988). Primary productivity, nutrients, and transparency during the early onset of eutrophication in ultra-oligotrophic Lake Tahoe, California-Nevada. <i>Limnology and Oceanography</i> , 33(6), 1321–1333.<br><a href="http://doi.org/10.4319/lo.1988.33.6.1321">http://doi.org/10.4319/lo.1988.33.6.1321</a>                                      | Used for nutrient or chlorophyll data in large lakes |
| Gonfiantini, R., et al. (1979). Isotope investigation of Lake Malawi, in <i>Isotopes in Lake Studies</i> , edited, pp. 195-207, International Atomic Energy Agency.                                                                                                                                                                                                  | Reported in Alin and Johnson (2007)                  |
| Gonzalez-Valencia, R. et al. Methane emissions from Mexican freshwater bodies: correlations with water pollution. <i>Hydrobiologia</i> 721, 9-22 (2014).                                                                                                                                                                                                             | Reported in Deemer et al. (2016)                     |
| Gruca-Rokosz, R., Czerwieniec, E. & Tomaszek, J. A. Methane emission from the Nielisz reservoir. <i>Environ. Prot. Eng.</i> 37, 101–109 (2011).                                                                                                                                                                                                                      | Reported in Deemer et al. (2016)                     |
| Gruca-Rokosz, R., Tomaszek, J., Koszelnik, P. & Czerwieniec, E. Methane and carbon dioxide emission from some reservoirs in SE Poland. <i>Limnol. Rev.</i> 10, 15–21 (2010).                                                                                                                                                                                         | Reported in Deemer et al. (2016)                     |
| Guérin, F. et al. Methane and carbon dioxide emissions from tropical reservoirs: Significance of downstream rivers. <i>Geophys. Res. Lett.</i> 33, (2006).                                                                                                                                                                                                           | Reported in Deemer et al. (2016)                     |
| Hampton, S. E., Izmet'eva, L. R., Moore, M. V., Katz, S. L., Dennis, B., & Silow, E. A. (2008). Sixty years of environmental change in the world's largest freshwater lake - Lake Baikal, Siberia. <i>Global Change Biology</i> , 14(8), 1947–1958.<br><a href="http://doi.org/10.1111/j.1365-2486.2008.01616.x">http://doi.org/10.1111/j.1365-2486.2008.01616.x</a> | Used for nutrient or chlorophyll data in large lakes |
| Harrison, J. A., Deemer, Bridget R., Birchfield, M.K. & Glavin, M.T. Water-level drawdown and eutrophication accelerate and may amplify methane emissions from Pacific Northwest U.S. reservoirs. <i>Environ. Sci. Technol.</i> In Revision.                                                                                                                         | Reported in Deemer et al. (2016)                     |
| Heath, R., Fahnenstiel, G. L., Gardner, W. S., Cavaletto, J., & Hwang, S. (1995). Ecosystem-level effects of zebra mussels ( <i>Dreissena polymorpha</i> ): An enclosure experiment in Saginaw Bay, Lake Huron. <i>Journal of Great Lakes Research</i> , 21(4), 501–516.                                                                                             | Used for nutrient or chlorophyll data in large lakes |
| Hecky, R. E., Mugidde, R., Ramlal, P. S., Talbot, M. R., & Kling, G. W. (2010). Multiple stressors cause rapid ecosystem change in Lake Victoria. <i>Freshwater Biology</i> , 55(SUPPL. 1), 19–42.<br><a href="http://doi.org/10.1111/j.1365-2427.2009.02374.x">http://doi.org/10.1111/j.1365-2427.2009.02374.x</a>                                                  | Used for nutrient or chlorophyll data in large lakes |
| Hendzel, L. L. et al. Nitrous oxide fluxes in three experimental boreal forest reservoirs. <i>Environ. Sci. Technol.</i> 39, 4353–4360 (2005).                                                                                                                                                                                                                       | Reported in Deemer et al. (2016)                     |

| Full Citation for Data Source                                                                                                                                                                                                                                                               | Metadata                                             |
|---------------------------------------------------------------------------------------------------------------------------------------------------------------------------------------------------------------------------------------------------------------------------------------------|------------------------------------------------------|
| Hobson, M. M. (1977). Water chemistry of Lake Maracaibo, Venezuela, and adjoining rivers and lagoons, Congreso Geologico Venezolano, V, 1807-1828.                                                                                                                                          | Reported in Alin and Johnson (2007)                  |
| Hobson, M. M. (1979). A preliminary geochemical study of Lake Maracaibo, Venezuela, Ph.D. thesis, 201 pp, University of Tulsa, Tulsa.                                                                                                                                                       | Reported in Alin and Johnson (2007)                  |
| Howard, D. L., et al. (1971). The potential for methane carbon cycling in Lake Erie. 14th Conference on Great Lakes Research, Int. Assoc. of Great Lakes Res. Ann Arbor, MI.                                                                                                                | Reported in Bastviken et al. (2004)                  |
| Huttunen, J. T. et al. Fluxes of CH <sub>4</sub> , CO <sub>2</sub> , and N <sub>2</sub> O in hydroelectric reservoirs Lokka and Porttipahta in the northern boreal zone in Finland. Glob. Biogeochem. Cycles 16, 1003 (2002).                                                               | Reported in Deemer et al. (2016)                     |
| Huttunen, J. T., et al. (2003). Fluxes of methane, carbon dioxide and nitrous oxide in boreal lakes and potential anthropogenic effects on the aquatic greenhouse gas emissions. Chemosphere 52(3): 609-621.                                                                                |                                                      |
| Iltis, A., et al. (1992). Physico-chemical properties of the water, in Lake Titicaca: A Synthesis of Limnological Knowledge, edited by C. Dejoux and A. Iltis, pp. 89-97, Kluwer Academic, Dordrecht.                                                                                       | Reported in Alin and Johnson (2007)                  |
| Imboden, D. M., et al. (1977). Lake Tahoe geochemical study. 1. Lake chemistry and tritium mixing study, Limnology and Oceanography, 22, 1039-1051.                                                                                                                                         | Reported in Alin and Johnson (2007)                  |
| Institutionen for Miljoanalys [ <a href="http://info1.ma.slu.se">http://info1.ma.slu.se</a> ]                                                                                                                                                                                               | Reported in Alin and Johnson (2007)                  |
| International Joint Commission (1976). The Waters of Lake Huron and Lake Superior. Volume I: Summary and Recommendations, 236 pp, International Joint Commission, Windsor, Ontario.                                                                                                         | Reported in Alin and Johnson (2007)                  |
| Itoh, M. et al. Effect of interannual variation in winter vertical mixing on CH <sub>4</sub> dynamics in a subtropical reservoir. J. Geophys. Res. Biogeosci. 120, 1246-1261 (2015).                                                                                                        | Reported in Deemer et al. (2016)                     |
| Jacinthe, P. A., Filippelli, G. M., Tedesco, L. P. & Raftis, R. Carbon storage and greenhouse gases emission from a fluvial reservoir in an agricultural landscape. Catena 94, 53–63 (2012).                                                                                                | Reported in Deemer et al. (2016)                     |
| JICA. (2000). <i>Control integral de la contaminacion del agua de la bahia interior de puno en el Lago Titicaca en la Republica del Peru.</i>                                                                                                                                               | Used for nutrient or chlorophyll data in large lakes |
| Jones, J. R., Obrecht, D. V, Graham, J. L., Balmer, M. B., Filstrup, C. T., & Downing, J. A. (2016). Seasonal patterns in carbon dioxide in 15 mid-continent (USA) reservoirs. Inland Waters, 6, 265–272. <a href="http://doi.org/10.5268/IW-6.2.982">http://doi.org/10.5268/IW-6.2.982</a> | Converted annual flux to daily flux                  |
| Joyce, J. & Jewell, P. W. Physical controls on methane ebullition from reservoirs and lakes. Environ. Eng. Geosci. 9, 167–178 (2003).                                                                                                                                                       | Reported in Deemer et al. (2016)                     |



| Full Citation for Data Source                                                                                                                                                                                                                                                                                                                                                                                      | Metadata                                                                                                                                |
|--------------------------------------------------------------------------------------------------------------------------------------------------------------------------------------------------------------------------------------------------------------------------------------------------------------------------------------------------------------------------------------------------------------------|-----------------------------------------------------------------------------------------------------------------------------------------|
| Kalfs, J. (1983). Phosphorus limitation in some tropical African lakes. <i>Hydrobiologia</i> , 100(1), 101–112. <a href="http://doi.org/10.1007/BF00027425">http://doi.org/10.1007/BF00027425</a>                                                                                                                                                                                                                  | Used for nutrient or chlorophyll data in large lakes                                                                                    |
| Katsev, S. (2017). When large lakes respond fast: A parsimonious model for phosphorus dynamics. <i>Journal of Great Lakes Research</i> , 43(1), 199–204. <a href="http://doi.org/10.1016/j.jglr.2016.10.012">http://doi.org/10.1016/j.jglr.2016.10.012</a>                                                                                                                                                         | Used for nutrient or chlorophyll data in large lakes                                                                                    |
| Keller, M. & Stallard, R. F. Methane emission by bubbling from Gatun Lake, Panama. <i>J. Geophys. Res.</i> 99, 8307–8319 (1994).                                                                                                                                                                                                                                                                                   | Reported in Deemer et al. (2016)                                                                                                        |
| Kelly, C. A. et al. Increases in fluxes of greenhouse gases and methyl mercury following flooding of an experimental reservoir. <i>Environ. Sci. Technol.</i> 31, 1334–1344 (1997).                                                                                                                                                                                                                                | Reported in Deemer et al. (2016)                                                                                                        |
| Kelly, C. a., Fee, E., Ramlal, P. S., Rudd, J. W. M., Hesslein, R. H., Anema, C., & Schindler, E. U. (2001). Natural variability of carbon dioxide and net epilimnetic production in the surface waters of boreal lakes of different sizes. <i>Limnology and Oceanography</i> , 46(5), 1054–1064. <a href="http://doi.org/10.4319/lo.2001.46.5.1054">http://doi.org/10.4319/lo.2001.46.5.1054</a>                  |                                                                                                                                         |
| Kelly, C. A., Rudd, J. W., St Louis, V. L. & Moore, T. Turning attention to reservoir surfaces, a neglected area in greenhouse studies. <i>Eos Trans. Am. Geophys. Union</i> 75, 332–333 (1994).                                                                                                                                                                                                                   | Reported in Deemer et al. (2016)                                                                                                        |
| Kemenes, A., Forsberg, B. R. & Melack, J. M. CO <sub>2</sub> emissions from a tropical hydroelectric reservoir (Balbina, Brazil). <i>J. Geophys. Res.</i> 116, G03004 (2011).                                                                                                                                                                                                                                      | Reported in Deemer et al. (2016)                                                                                                        |
| Kemenes, A., Forsberg, B. R. & Melack, J. M. Methane release below a tropical hydroelectric dam. <i>Geophys. Res. Lett.</i> 34, L12809 (2007).                                                                                                                                                                                                                                                                     | Reported in Deemer et al. (2016)                                                                                                        |
| Kling, G. W., Kipphut, G. W., & Miller, M. C. (1992). The flux of CO <sub>2</sub> and CH <sub>4</sub> from lakes and rivers in arctic Alaska. <i>Hydrobiologia</i> , 240, 23–36.                                                                                                                                                                                                                                   | Reported in Bastviken et al. (2004)                                                                                                     |
| Knoll, L. B., Vanni, M. J., Renwick, W. H., Dittman, E. K. & Gephart, J. A. Temperate reservoirs are large carbon sinks and small CO <sub>2</sub> sources: Results from high-resolution carbon budgets. <i>Glob. Biogeochem. Cycles</i> 27, 52–64 (2013).                                                                                                                                                          | Reported in Deemer et al. (2016)                                                                                                        |
| Kortelainen, P., Huttunen, J. T., Vaisanen, T., Mattsson, T., Karjalainen, P., & Martikainen, P. (2000). CH <sub>4</sub> , CO <sub>2</sub> and N <sub>2</sub> O supersaturation in 12 Finnish lakes before and after ice melt. <i>Verh. Int. Ver. Limnol.</i> , 27(3), 1410–1414.                                                                                                                                  | Was in contact with authors for individual flux and/or variable data; Calculated flux using methods of Rantakari and Kortelainen (2005) |
| Kortelainen, P., Rantakari, M., Huttunen, J. T., Mattsson, T., Alm, J., Juutinen, S., ... Martikainen, P. J. (2006). Sediment respiration and lake trophic state are important predictors of large CO <sub>2</sub> evasion from small boreal lakes. <i>Global Change Biology</i> , 12(8), 1554–1567. <a href="http://doi.org/10.1111/j.1365-2486.2006.01167.x">http://doi.org/10.1111/j.1365-2486.2006.01167.x</a> | Was in contact with authors for individual flux and/or variable data                                                                    |

| Full Citation for Data Source                                                                                                                                                                                                                                                                                                                    | Metadata                                             |
|--------------------------------------------------------------------------------------------------------------------------------------------------------------------------------------------------------------------------------------------------------------------------------------------------------------------------------------------------|------------------------------------------------------|
| Kozhova, O. M., and L. R. Izmet'seva (1998). Lake Baikal: Evolution and Biodiversity, Backhuys Publishers, Leiden.                                                                                                                                                                                                                               | Reported in Alin and Johnson (2007)                  |
| Kumar, A. & Sharma, M. P. Impact of water quality on GHG emissions from Hydropower Reservoir. <i>J Mater Env. Sci</i> 5, 95–100 (2014).                                                                                                                                                                                                          | Reported in Deemer et al. (2016)                     |
| Kumar, A. & Sharma, M.P. Assessment of risk of GHG emissions from Tehri hydropower reservoir, India. <i>Human and Ecological Risk Assessment</i> 22, 71-85 (2016).                                                                                                                                                                               | Reported in Deemer et al. (2016)                     |
| Lacayo, M. (1991). Physical and Chemical Features of Lake Xolotl. <i>Aquatic Ecology</i> , 25(2), 111–116. Retrieved from <a href="http://www.springerlink.com/index/J73417G42240061V.pdf">http://www.springerlink.com/index/J73417G42240061V.pdf</a>                                                                                            | Used for nutrient or chlorophyll data in large lakes |
| Lapierre, J.-F., Guillemette, F., Berggren, M., & Del Giorgio, P. a. (2013). Increases in terrestrially derived carbon stimulate organic carbon processing and CO <sub>2</sub> emissions in boreal aquatic ecosystems. <i>Nature Communications</i> , 4, 2972. <a href="http://doi.org/10.1038/ncomms3972">http://doi.org/10.1038/ncomms3972</a> | Supplied by P. del Giorgio                           |
| Lazzarino, J. K., Bachmann, R. W., Hoyer, M. V., & Canfield, D. E. (2009). Carbon dioxide supersaturation in Florida lakes. <i>Hydrobiologia</i> , 627(1), 169–180. <a href="http://doi.org/10.1007/s10750-009-9723-y">http://doi.org/10.1007/s10750-009-9723-y</a>                                                                              | Supplied by D. Canfield                              |
| Lehman, J. T., and D. K. Branstrator (1994). Nutrient dynamics and turnover rates of phosphate and sulfate in Lake Victoria, East Africa, <i>Limnology and Oceanography</i> , 39, 227-233.                                                                                                                                                       | Reported in Alin and Johnson (2007)                  |
| Lehman, J. T., et al. (1998). Nutrients and plankton biomass in the rift lake sources of the White Nile: lakes Albert and Edward, in <i>Environmental Change and Response in East African Lakes</i> , edited by J. T. Lehman, pp. 157-172, Kluwer Academic Publishers, Dordrecht, The Netherlands.                                               | Reported in Alin and Johnson (2007)                  |
| Li, S. & Zhang, Q. Major ion chemistry and weathering processes of the Danjiangkou Reservoir, China. <i>Hydrol. Sci. J.</i> 55, 1385–1395 (2010).                                                                                                                                                                                                | Reported in Deemer et al. (2016)                     |
| Li, S. & Zhang, Q. Partial pressure of CO <sub>2</sub> and CO <sub>2</sub> emission in a monsoon-driven hydroelectric reservoir (Danjiangkou Reservoir), China. <i>Ecol. Eng.</i> 71, 401–414 (2014).                                                                                                                                            | Reported in Deemer et al. (2016)                     |
| Li, S., Zhang, Q., Bush, R. T. & Sullivan, L. A. Methane and CO <sub>2</sub> emissions from China's hydroelectric reservoirs: a new quantitative synthesis. <i>Environ. Sci. Pollut. Res.</i> 22, 5325–5339 (2015).                                                                                                                              | Reported in Deemer et al. (2016)                     |
| Li, Z. et al. Spatio-temporal variations of carbon dioxide and its gross emission regulated by artificial operation in a typical hydropower reservoir in China. <i>Environ. Monit. Assess.</i> 186, 3023–3039 (2014).                                                                                                                            | Reported in Deemer et al. (2016)                     |
| Lima, I. B. T. Biogeochemical distinction of methane releases from two Amazon hydroreservoirs. <i>Chemosphere</i> 59, 1697–1702 (2005).                                                                                                                                                                                                          | Reported in Deemer et al. (2016)                     |

| Full Citation for Data Source                                                                                                                                                                                                                                                                   | Metadata                                                                                                  |
|-------------------------------------------------------------------------------------------------------------------------------------------------------------------------------------------------------------------------------------------------------------------------------------------------|-----------------------------------------------------------------------------------------------------------|
| Lima, I. B. T. et al. Methane, carbon dioxide and nitrous oxide emissions from two Amazonian Reservoirs during high water table. <i>Verh. Int. Ver. Limnol.</i> 28, 438–442 (2002).                                                                                                             | Reported in Deemer et al. (2016)                                                                          |
| Lima, I. B. T., de Moraes Novo, E. M. L., Ballester, M. V. R. & Ometto, J. P. Methane production, transport and emission in Amazon hydroelectric plants. in <i>Geoscience and Remote Sensing Symposium Proceedings, 1998. IGARSS'98. 1998 IEEE International 5</i> , 2529–2531 (IEEE, 1998).    | Reported in Deemer et al. (2016)                                                                          |
| Limon, J. G., et al. (1989). Long- and short-term variation in the physical and chemical limnology of a large, shallow, turbid tropical lake(Lake Chapala, Mexico), <i>Archiv fur Hydrobiologie, Suppl.</i> 83, 57-81.                                                                          | Reported in Alin and Johnson (2007)                                                                       |
| Liu, H. et al. Large CO <sub>2</sub> effluxes at night and during synoptic weather events significantly contribute to CO <sub>2</sub> emissions from a reservoir. <i>Environ. Res. Letters</i> 11, 1-8 (2016).                                                                                  | Reported in Deemer et al. (2016)                                                                          |
| Liu, X.-L. et al. Spatiotemporal variations of nitrous oxide (N <sub>2</sub> O) emissions from two reservoirs in SW China. <i>Atmos. Environ.</i> 45, 5458–5468 (2011).                                                                                                                         | Reported in Deemer et al. (2016)                                                                          |
| Lu, F. et al. Preliminary report on methane emissions from the Three Gorges Reservoir in the summer drainage period. <i>J. Environ. Sci.</i> 23, 2029–2033 (2011).                                                                                                                              | Reported in Deemer et al. (2016)                                                                          |
| Lü, Y. C., Liu, C.-Q., Wang, S. L., Xu, G. & Liu, F. Seasonal variability of pCO <sub>2</sub> in the two Karst reservoirs, Hongfeng and Baihua Lakes in Guizhou Province, China. <i>Environ. Sci.</i> 28, 2674–2681 (2007).                                                                     | Reported in Deemer et al. (2016)                                                                          |
| Maberly, S. C., Barker, P. a., Stott, A. W., Ville, D., & Mitzi, M. (2013). Catchment productivity controls CO <sub>2</sub> emissions from lakes. <i>Nature Climate Change</i> , 3(4), 391–394. <a href="http://doi.org/10.1038/nclimate1748">http://doi.org/10.1038/nclimate1748</a>           | Was in contact with authors for individual flux and/or variable data; Converted annual flux to daily flux |
| Macias, J. G. L., & Lind, O. (1990). The Management of Lake Chapala (México): Considerations After Significant Changes in the Water Regime. <i>Lake And Reservoir Management</i> , 6(1), 61–70. <a href="http://doi.org/10.1080/07438149009354696">http://doi.org/10.1080/07438149009354696</a> | Used for nutrient or chlorophyll data in large lakes                                                      |
| Maeck, A. et al. Sediment trapping by dams creates methane emission hot spots. <i>Environ. Sci. Technol.</i> 47, 8130–8137 (2013).                                                                                                                                                              | Reported in Deemer et al. (2016)                                                                          |
| Maeck, A., Hofmann, H. & Lorke, A. Pumping methane out of aquatic sediments- ebullition forcing mechanisms in an impounded river. <i>Biogeosciences</i> 11, 2925–2938 (2014).                                                                                                                   | Reported in Deemer et al. (2016)                                                                          |
| Mandych, A. F. (Ed.) (1995). <i>Enclosed Seas and Large Lakes of Eastern Europe and Middle Asia</i> , SPB Academic Publishing, Amsterdam.                                                                                                                                                       | Reported in Alin and Johnson (2007)                                                                       |

| Full Citation for Data Source                                                                                                                                                                                                                                                                                                                                                                                              | Metadata                                                             |
|----------------------------------------------------------------------------------------------------------------------------------------------------------------------------------------------------------------------------------------------------------------------------------------------------------------------------------------------------------------------------------------------------------------------------|----------------------------------------------------------------------|
| Marcé, R., Obrador, B., Morguá, J.-A., Lluís Riera, J., López, P., & Armengol, J. (2015). Carbonate weathering as a driver of CO <sub>2</sub> supersaturation in lakes. <i>Nature Geoscience</i> , 8, 107–111. <a href="http://doi.org/10.1038/ngeo2341">http://doi.org/10.1038/ngeo2341</a>                                                                                                                               | Was in contact with authors for individual flux and/or variable data |
| Marcelino, A.A. et al. Diffusive emission of methane and carbon dioxide from two hydropower reservoirs in Brazil. <i>Braz. J. Biol.</i> 75, 331-338 (2015).                                                                                                                                                                                                                                                                | Reported in Deemer et al. (2016)                                     |
| Matthews, C. J. et al. Carbon dioxide and methane production in small reservoirs flooding upland boreal forest. <i>Ecosystems</i> 8, 267–285 (2005).                                                                                                                                                                                                                                                                       | Reported in Deemer et al. (2016)                                     |
| Mattson, M. D., & Likens, G. E. (1993). Redox reactions of organic matter decomposition in a soft water lake. <i>Biogeochemistry</i> , 19(3), 149–172. <a href="http://doi.org/10.1007/BF00000876">http://doi.org/10.1007/BF00000876</a>                                                                                                                                                                                   | Reported in Bastviken et al. (2004)                                  |
| Mccauley, E., Downing, J. A., & Watson, S. (1989). Sigmoid relationships between nutrients and chlorophyll among lakes. <i>Canadian Journal of Fisheries and Aquatic Sciences</i> , 46, 1171–1175.                                                                                                                                                                                                                         | Used for nutrient or chlorophyll data in large lakes                 |
| McDonald, C. P., Stets, E. G., Striegl, R. G., & Butman, D. (2013). Inorganic carbon loading as a primary driver of dissolved carbon dioxide concentrations in the lakes and reservoirs of the contiguous United States. <i>Global Biogeochemical Cycles</i> , 27(2), 285–295. <a href="http://doi.org/10.1002/gbc.20032">http://doi.org/10.1002/gbc.20032</a>                                                             | Was in contact with authors for individual flux and/or variable data |
| Mello, N. A. S. T., Brighenti, L. S., Barbosa, F. A. R. & Neto, J. F. B. N. Spatial variability of methane (CH <sub>4</sub> ) ebullition in a tropical hypereutrophic reservoir: silted areas as a bubble hotspot. (Universidade Federal de Minas Gerais, Brazil PhD Thesis, 2015)                                                                                                                                         | Reported in Deemer et al. (2016)                                     |
| Mengis, M., Gächter, R., & Wehrli, B. (1996). Nitrous oxide emissions to the atmosphere from an artificially oxygenated lake. <i>Limnology and Oceanography</i> , 41(3), 548–553. <a href="http://doi.org/10.4319/lo.1996.41.3.0548">http://doi.org/10.4319/lo.1996.41.3.0548</a>                                                                                                                                          |                                                                      |
| Michmerhuizen, C. M., Striegl, R. G., & Mcdonald, M. E. (1996). Potential methane emission from north-temperate lakes following ice melt. <i>Limnology and Oceanography</i> , 41(5), 985–991. <a href="http://doi.org/10.4319/lo.1996.41.5.0985">http://doi.org/10.4319/lo.1996.41.5.0985</a>                                                                                                                              | Reported in Bastviken et al. (2004)                                  |
| Miettinen, H., Pumpanen, J., Heiskanen, J. J., Aaltonen, H., Mammarella, I., Ojala, A., ... Rantakari, M. (2015). Towards a more comprehensive understanding of lacustrine greenhouse gas dynamics — two- year measurements of concentrations and fluxes of CO <sub>2</sub> , CH <sub>4</sub> and N <sub>2</sub> O in a typical boreal lake surrounded by managed forests. <i>Boreal Environment Research</i> , 20, 75–89. |                                                                      |
| Miyajima, T., et al. (1997). Distribution of greenhouse gases, nitrite, and delta C-13 of dissolved inorganic carbon in Lake Biwa: Implications for hypolimnetic metabolism. <i>Biogeochemistry</i> 36(2): 205-221.                                                                                                                                                                                                        | Reported in Bastviken et al. (2004)                                  |

| Full Citation for Data Source                                                                                                                                                                                                                                                                                                                          | Metadata                                             |
|--------------------------------------------------------------------------------------------------------------------------------------------------------------------------------------------------------------------------------------------------------------------------------------------------------------------------------------------------------|------------------------------------------------------|
| Montenegro-Guillen, S. (1991). Limnological perspective of Lake Xolotlan Managua): the PLALM, <i>Hydrobiological Bulletin</i> , 25, 105-109.                                                                                                                                                                                                           | Reported in Alin and Johnson (2007)                  |
| Moore, W. (1980). Seasonal Distribution of Phytoplankton in Yellowknife Bay, Great Slave Lake. <i>Int. Revue Ges. Hydrobiol</i> , 65(2), 283–293.                                                                                                                                                                                                      | Used for nutrient or chlorophyll data in large lakes |
| Morales-Pineda, M., Cózar, A., Laiz, I., Úbeda, B. & Gálvez, J. Á. Daily, biweekly, and seasonal temporal scales of CO2 variability in two stratified Mediterranean reservoirs. <i>J. Geophys. Res. Biogeosciences</i> 119, 509–520 (2014).                                                                                                            | Reported in Deemer et al. (2016)                     |
| Mosher, J.J. et al. Spatial and temporal correlates of greenhouse gas diffusion from a hydropower reservoir in the southern United States. <i>Water</i> 7, 5910-5927 (2015).                                                                                                                                                                           | Reported in Deemer et al. (2016)                     |
| Musenze, R. S. et al. Assessing the spatial and temporal variability of diffusive methane and nitrous oxide emissions from subtropical freshwater reservoirs. <i>Environ. Sci. Technol.</i> 48, 14499–14507 (2014).                                                                                                                                    | Reported in Deemer et al. (2016)                     |
| Nasrollahzadeh, H. S., Din, Z. Bin, Foong, S. Y., & Makhloogh, A. (2008). Trophic status of the Iranian Caspian Sea based on water quality parameters and phytoplankton diversity. <i>Continental Shelf Research</i> , 28(9), 1153–1165. <a href="http://doi.org/10.1016/j.csr.2008.02.015">http://doi.org/10.1016/j.csr.2008.02.015</a>               | Used for nutrient or chlorophyll data in large lakes |
| National Data Buoy Center [ <a href="http://ndbc.noaa.gov">http://ndbc.noaa.gov</a> ]                                                                                                                                                                                                                                                                  | Reported in Alin and Johnson (2007)                  |
| Navarro, M. B., Balseiro, E., & Modenutti, B. (2014). Bacterial Community Structure in Patagonian Andean Lakes Above and Below Timberline: From Community Composition to Community Function. <i>Microbial Ecology</i> , 68(3), 528–541. <a href="http://doi.org/10.1007/s00248-014-0439-9">http://doi.org/10.1007/s00248-014-0439-9</a>                | Used for nutrient or chlorophyll data in large lakes |
| Ogata, E. M., Wurtsbaugh, W. A., Smith, T. N., & Durham, S. L. (2017). Bioassay analysis of nutrient and <i>Artemia franciscana</i> effects on trophic interactions in the Great Salt Lake, USA. <i>Hydrobiologia</i> , 788(1). <a href="http://doi.org/10.1007/s10750-016-2881-9">http://doi.org/10.1007/s10750-016-2881-9</a>                        | Used for nutrient or chlorophyll data in large lakes |
| Ojala, A., Bellido, J. L., Tulonen, T., Kankaala, P., & Huotari, J. (2011). Carbon gas fluxes from a brown-water and a clear-water lake in the boreal zone during a summer with extreme rain events. <i>Limnology and Oceanography</i> , 56(1), 61–76. <a href="http://doi.org/10.4319/lo.2011.56.1.0061">http://doi.org/10.4319/lo.2011.56.1.0061</a> |                                                      |
| Ometto, J. P. et al. Carbon emission as a function of energy generation in hydroelectric reservoirs in Brazilian dry tropical biome. <i>Energy Policy</i> 58, 109–116 (2013).                                                                                                                                                                          | Reported in Deemer et al. (2016)                     |

| Full Citation for Data Source                                                                                                                                                                                                                                                                                                                              | Metadata                                             |
|------------------------------------------------------------------------------------------------------------------------------------------------------------------------------------------------------------------------------------------------------------------------------------------------------------------------------------------------------------|------------------------------------------------------|
| Outram, F. N. and K. M. Hiscock (2012). Indirect nitrous oxide emissions from surface water bodies in a lowland arable catchment: a significant contribution to agricultural greenhouse gas budgets? <i>Environmental Science &amp; Technology</i> 46(15): 8156-8163.                                                                                      |                                                      |
| Pacheco, F. S. et al. The effects of river inflow and retention time on the spatial heterogeneity of chlorophyll and water–air CO <sub>2</sub> fluxes in a tropical hydropower reservoir. <i>Biogeosciences</i> 12, 147–162 (2015).                                                                                                                        | Reported in Deemer et al. (2016)                     |
| Pacheco, F., Roland, F. & Downing, J. Eutrophication reverses whole-lake carbon budgets. <i>Inland Waters</i> 4, 41–48 (2013).                                                                                                                                                                                                                             | Reported in Deemer et al. (2016)                     |
| Parra-Pardi, G. (1983). Cone-Shaped Hypolimnion and Local Reactor as Outstanding Features in Eutrophication of Lake Maracaibo. <i>Journal of Great Lakes Research</i> , 9(4), 439–451. <a href="http://doi.org/10.1016/S0380-1330(83)71918-0">http://doi.org/10.1016/S0380-1330(83)71918-0</a>                                                             | Used for nutrient or chlorophyll data in large lakes |
| Patterson, G., and O. Kachinjika (1995). Limnology and phytoplankton ecology, in <i>The Fishery Potential and Productivity of the Pelagic Zone of Lake Malawi/Niassa</i> , edited by A. Menz, pp. 1-67, Natural Resources Institute, Chatham, UK.                                                                                                          | Reported in Alin and Johnson (2007)                  |
| Petr, T. (1992). Lake Balkhash, Kazakhstan. <i>International Journal of Salt Lake Research</i> , 1(1), 21–46. <a href="http://doi.org/10.1007/BF02904950">http://doi.org/10.1007/BF02904950</a>                                                                                                                                                            | Used for nutrient or chlorophyll data in large lakes |
| Plisnier, P. D., Chitamwebwa, D., Mwape, L., Tshibangu, K., Langenberg, V., & Coenen, E. (1999). Limnological annual cycle inferred from physical-chemical fluctuations at three stations of Lake Tanganyika. In <i>From Limnology to Fisheries: Lake Tanganyika and Other Large Lakes</i> (pp. 45-58). Springer Netherlands.                              | Used for nutrient or chlorophyll data in large lakes |
| Popovskaya, G. I., Firsova, A. D., Bessudova, A. Y., Sakirko, M. V., Sutorin, A. N., & Likhoshway, Y. V. (2012). Phytoplankton of the Irkutsk Reservoir as an indicator of water quality. <i>Oceanological and Hydrobiological Studies</i> , 41(2), 29–38. <a href="http://doi.org/10.2478/s13545-012-0014-2">http://doi.org/10.2478/s13545-012-0014-2</a> | Used for nutrient or chlorophyll data in large lakes |
| Poste, A. E., Hecky, R. E., & Guildford, S. J. (2011). Evaluating microcystin exposure risk through fish consumption. <i>Environmental Science and Technology</i> , 45(13), 5806–5811. <a href="http://doi.org/10.1021/es200285c">http://doi.org/10.1021/es200285c</a>                                                                                     | Used for nutrient or chlorophyll data in large lakes |
| Poste, A. E., Muir, D. C. G., Guildford, S. J., & Hecky, R. E. (2015). Bioaccumulation and biomagnification of mercury in African lakes: The importance of trophic status. <i>Science of the Total Environment</i> , 506–507, 126–136. <a href="http://doi.org/10.1016/j.scitotenv.2014.10.094">http://doi.org/10.1016/j.scitotenv.2014.10.094</a>         | Used for nutrient or chlorophyll data in large lakes |
| Pothoven, S. A., & Fahnenstiel, G. L. (2013). Recent change in summer chlorophyll a dynamics of southeastern Lake Michigan. <i>Journal of Great Lakes Research</i> , 39(2), 287–294. <a href="http://doi.org/10.1016/j.jglr.2013.02.005">http://doi.org/10.1016/j.jglr.2013.02.005</a>                                                                     | Used for nutrient or chlorophyll data in large lakes |

| Full Citation for Data Source                                                                                                                                                                                                                                                                                                                                                                    | Metadata                                                             |
|--------------------------------------------------------------------------------------------------------------------------------------------------------------------------------------------------------------------------------------------------------------------------------------------------------------------------------------------------------------------------------------------------|----------------------------------------------------------------------|
| Rantakari, M., & Kortelainen, P. (2005). Interannual variation and climatic regulation of the CO <sub>2</sub> emission from large boreal lakes. <i>Global Change Biology</i> , 11(8), 1368–1380. <a href="http://doi.org/10.1111/j.1365-2486.2005.00982.x">http://doi.org/10.1111/j.1365-2486.2005.00982.x</a>                                                                                   | Was in contact with authors for individual flux and/or variable data |
| Rasilo, T., Prairie, Y. T., & del Giorgio, P. A. (2015). Large-scale patterns in summer diffusive CH <sub>4</sub> fluxes across boreal lakes, and contribution to diffusive C emissions. <i>Global Change Biology</i> , 21, 1124–1139, doi:10.1111/gcb.12741. <a href="http://doi.org/10.1111/gcb.12741">http://doi.org/10.1111/gcb.12741</a>                                                    | Supplied by P. del Giorgio                                           |
| Riera, J. L., Schindler, J. E., & Kratz, T. K. (1999). Seasonal dynamics of carbon dioxide and methane in two clear-water lakes and two bog lakes in northern Wisconsin, U.S.A. <i>Can J Fish Aquat Sci</i> , 274, 1–10. <a href="http://doi.org/10.1139/f98-182">http://doi.org/10.1139/f98-182</a>                                                                                             | Reported in Bastviken et al. (2004)                                  |
| Rinta, P., Bastviken, D., Schilder, J., Van Hardenbroek, M., Stötter, T., & Heiri, O. (2017). Higher late summer methane emission from central than northern European lakes. <i>Journal of Limnology</i> , 76(1), 52–67. <a href="http://doi.org/10.4081/jlimnol.2016.1475">http://doi.org/10.4081/jlimnol.2016.1475</a>                                                                         |                                                                      |
| Roehm, C. & Tremblay, A. Role of turbines in the carbon dioxide emissions from two boreal reservoirs, Québec, Canada. <i>J. Geophys. Res.</i> 111, (2006).                                                                                                                                                                                                                                       | Reported in Deemer et al. (2016)                                     |
| Roland, F. et al. Variability of carbon dioxide flux from tropical (Cerrado) hydroelectric reservoirs. <i>Aquat. Sci.</i> 72, 283–293 (2010).                                                                                                                                                                                                                                                    | Reported in Deemer et al. (2016)                                     |
| Rosa, L. P. et al. Biogenic gas production from major Amazon reservoirs, Brazil. <i>Hydrol. Process.</i> 17, 1443–1450 (2003).                                                                                                                                                                                                                                                                   | Reported in Deemer et al. (2016)                                     |
| Rosa, L. P., Dos Santos, M. A., Matvienko, B., dos Santos, E. O. & Sikar, E. Greenhouse gas emissions from hydroelectric reservoirs in tropical regions. <i>Clim. Change</i> 66, 9–21 (2004).                                                                                                                                                                                                    | Reported in Deemer et al. (2016)                                     |
| Rudd, J. W. M., & Hamilton, R. D. (1978). Methane cycling in a eutrophic shield lake and its effects on whole lake metabolism. <i>Limnology and Oceanography</i> , 23(2), 337–348. <a href="http://doi.org/10.4319/lo.1978.23.2.0337">http://doi.org/10.4319/lo.1978.23.2.0337</a>                                                                                                               | Reported in Bastviken et al. (2004)                                  |
| Rukhovets, L. A., Astrakhantsev, G. P., Menshutkin, V. V., Minina, T. R., Petrova, N. A., & Poloskov, V. N. (2003). Development of Lake Ladoga ecosystem models: Modeling of the phytoplankton succession in the eutrophication process. I. <i>Ecological Modelling</i> , 165(1), 49–77. <a href="http://doi.org/10.1016/S0304-3800(03)00061-9">http://doi.org/10.1016/S0304-3800(03)00061-9</a> | Used for nutrient or chlorophyll data in large lakes                 |
| Salk, K. R., et al. (2016). Ecosystem metabolism and greenhouse gas production in a mesotrophic northern temperate lake experiencing seasonal hypoxia. <i>Biogeochemistry</i> 131(3): 303-319.                                                                                                                                                                                                   |                                                                      |

| Full Citation for Data Source                                                                                                                                                                                                                                                                                                                                     | Metadata                                             |
|-------------------------------------------------------------------------------------------------------------------------------------------------------------------------------------------------------------------------------------------------------------------------------------------------------------------------------------------------------------------|------------------------------------------------------|
| Sarmiento, H., Isumbicho, M., & Descy, J. P. (2006). Phytoplankton ecology of Lake Kivu (eastern Africa). <i>Journal of Plankton Research</i> , 28(9), 815–829. <a href="http://doi.org/10.1093/plankt/fbl017">http://doi.org/10.1093/plankt/fbl017</a>                                                                                                           | Used for nutrient or chlorophyll data in large lakes |
| Sarmiento, H., Isumbicho, M., Stenuite, S., Darchambeau, F., & Leporcq, B. (2009). Phytoplankton ecology of Lake Kivu (eastern Africa): biomass, production and elemental ratios. <i>Proceedings of the International Association of Theoretical and Applied Limnology</i> , 30(January), 709–713.                                                                | Used for nutrient or chlorophyll data in large lakes |
| Savvaitova, K., and T. Petr (1992). Lake Issyk-kul, Kirgizia, <i>International Journal of Salt Lake Research</i> , 1, 21-46.                                                                                                                                                                                                                                      | Reported in Alin and Johnson (2007)                  |
| Schilder, J., Bastviken, D., van Hardenbroek, M., Kankaala, P., Rinta, P., Stötter, T., & Heiri, O. (2013). Spatial heterogeneity and lake morphology affect diffusive greenhouse gas emission estimates of lakes. <i>Geophysical Research Letters</i> , 40(21), 5752–5756. <a href="http://doi.org/10.1002/2013GL057669">http://doi.org/10.1002/2013GL057669</a> |                                                      |
| Schindler, D. W. (1972). Production of phytoplankton and zooplankton in Canadian Shield Lakes, in <i>Productivity Problems of Freshwaters</i> , edited by Z. Kajak and A. Hillbricht-Ilkowska, pp. 309-331, Polish Scientific Publishers, Warsaw.                                                                                                                 | Reported in Alin and Johnson (2007)                  |
| Schulz, M., et al. (2001). The methane cycle in the epilimnion of Lake Constance. <i>Archiv Fur Hydrobiologie</i> 151(1): 157-176.                                                                                                                                                                                                                                | Reported in Bastviken et al. (2004)                  |
| Selvam, B. P., Natchimuthu, S., Arunachalam, L. & Bastviken, D. Methane and carbon dioxide emissions from inland waters in India - implications for large scale greenhouse gas balances. <i>Glob. Change Biol.</i> 20, 3397–3407 (2014).                                                                                                                          | Reported in Deemer et al. (2016)                     |
| Sharov, A. N., Berezina, N. A., Nazarova, L. E., Poliakova, T. N., & Chekryzheva, T. A. (2014). Links between biota and climate-related variables in the Baltic region using Lake Onega as an example. <i>Oceanologia</i> , 56(2), 291–306. <a href="http://doi.org/10.5697/oc.56-2.291">http://doi.org/10.5697/oc.56-2.291</a>                                   | Used for nutrient or chlorophyll data in large lakes |
| Smith, K., & Lewis, W. . (1992). Seasonality of methane emissions from five lakes and associated wetlands of the Colorado Rockies. <i>Global Biogeochem. Cycles</i> , 6(4), 323–338.                                                                                                                                                                              | Reported in Bastviken et al. (2004)                  |
| Smith, L. K. & Lewis, W. M. J. Seasonality of methane emissions from five lakes and associated wetlands of the Colorado Rockies. <i>Glob. Biogeochem. Cycles</i> 6, 323–338 (1992).                                                                                                                                                                               | Reported in Deemer et al. (2016)                     |
| Sommer, U., Gaedke, U., & Schweizer, A. (1993). The first decade of oligotrophication of Lake Constance. <i>Oecologia</i> , 93, 276–284. <a href="http://doi.org/10.1007/BF00317682">http://doi.org/10.1007/BF00317682</a>                                                                                                                                        | Used for nutrient or chlorophyll data in large lakes |
| Soued, C., del Giorgio, P. A., & Maranger, R. (2016). Nitrous oxide sinks and emissions in boreal aquatic networks in Québec. <i>Nature Geoscience</i> , (December), 1–7. <a href="http://doi.org/10.1038/ngeo2611">http://doi.org/10.1038/ngeo2611</a>                                                                                                           | Supplied by R. Maranger and P. del Giorgio           |



| Full Citation for Data Source                                                                                                                                                                                                                                                                                                                                                                                           | Metadata                            |
|-------------------------------------------------------------------------------------------------------------------------------------------------------------------------------------------------------------------------------------------------------------------------------------------------------------------------------------------------------------------------------------------------------------------------|-------------------------------------|
| Soumis, N., Duchemin, É., Canuel, R. & Lucotte, M. Greenhouse gas emissions from reservoirs of the western United States. <i>Glob. Biogeochem. Cycles</i> 18, GB3022 (2004).                                                                                                                                                                                                                                            | Reported in Deemer et al. (2016)    |
| St. Louis, V. L., Kelly, C. A., Duchemin, É., Rudd, J. W. & Rosenberg, D. M. Reservoir surfaces as sources of greenhouse gases to the atmosphere: a global estimate. <i>BioScience</i> 50, 766–775 (2000).                                                                                                                                                                                                              | Reported in Deemer et al. (2016)    |
| Stabel, H.-H. (1986). Calcite precipitation in Lake Constance: chemical equilibrium, sedimentation, and nucleation by algae, <i>Limnology and Oceanography</i> , 31, 1081-1093.                                                                                                                                                                                                                                         | Reported in Alin and Johnson (2007) |
| Strayer, R. F., & Tiedje, J. M. (1978). In situ methane production in a small, hypereutrophic, hard-water lake: Loss of methane from sediments by vertical diffusion and ebullition. <i>Limnology and Oceanography</i> , 23(6), 1201–1206.<br><a href="http://doi.org/10.4319/lo.1978.23.6.1201">http://doi.org/10.4319/lo.1978.23.6.1201</a>                                                                           | Reported in Bastviken et al. (2004) |
| Sturm, K., Yuan, Z., Gibbes, B., Werner, U. & Grinham, A. Methane and nitrous oxide sources and emissions in a subtropical freshwater reservoir, South East Queensland, Australia. <i>Biogeosciences</i> 11, 5245–5258 (2014).                                                                                                                                                                                          | Reported in Deemer et al. (2016)    |
| Tadonlélé, R. D., Marty, J. & Planas, D. Assessing factors underlying variation of CO <sub>2</sub> emissions in boreal lakes vs. reservoirs. <i>FEMS Microbiol. Ecol.</i> 79, 282–297 (2012).                                                                                                                                                                                                                           | Reported in Deemer et al. (2016)    |
| Talling, J. F. (1963). Origin of stratification in an African rift lake, <i>Limnology and Oceanography</i> , 8, 68-78.                                                                                                                                                                                                                                                                                                  | Reported in Alin and Johnson (2007) |
| Talling, J. F., and I. B. Talling (1965). The chemical composition of African lake waters, <i>Int. Revue ges. Hydrobiol.</i> , 50, 421-463.                                                                                                                                                                                                                                                                             | Reported in Alin and Johnson (2007) |
| Teodoru, C. R. et al. The net carbon footprint of a newly created boreal hydroelectric reservoir. <i>Glob. Biogeochem. Cycles</i> 26, GB2016 (2012).                                                                                                                                                                                                                                                                    | Reported in Deemer et al. (2016)    |
| Teodoru, C.R. et al. Dynamics of greenhouse gases (CO <sub>2</sub> ,CH <sub>4</sub> ,N <sub>2</sub> O) along the Zambezi River and major tributaries, and their importance in the riverine carbon budget. <i>Biogeosciences</i> 12, 2431-2453 (2015).                                                                                                                                                                   | Reported in Deemer et al. (2016)    |
| Therrien, J., Tremblay, A. & Jacques, R. B. in <i>Greenhouse Gas Emissions- Fluxes and Processes: Hydroelectric Reservoirs and Natural Environments</i> (eds. Tremblay, A., Varfalvy, L., Roehm, C. & Garneau, M.) (Springer, 2005).                                                                                                                                                                                    | Reported in Deemer et al. (2016)    |
| Tremblay, A., Therrien, J., Hamlin, B., Wichmann, E. & LeDrew, L. J. in <i>Greenhouse gas emissions-- fluxes and processes hydroelectric reservoirs and natural environments</i> (eds. Tremblay, A., Varfalvy, L., Roehm, C. & Garneau, M.) 209–232 (Springer, 2005). at<br>< <a href="http://public.ebib.com/choice/publicfullrecord.aspx?p=304099">http://public.ebib.com/choice/publicfullrecord.aspx?p=304099</a> > | Reported in Deemer et al. (2016)    |

| Full Citation for Data Source                                                                                                                                                                                                                                                                                                                                                                                                                                                               | Metadata                                             |
|---------------------------------------------------------------------------------------------------------------------------------------------------------------------------------------------------------------------------------------------------------------------------------------------------------------------------------------------------------------------------------------------------------------------------------------------------------------------------------------------|------------------------------------------------------|
| Tsigelnaya, I. D. (1995). Issyk-Kul' lake, in <i>Enclosed Seas and Large Lakes of Eastern Europe and Middle Asia</i> , edited by A. F. Mandych, pp. 199-229, SPB Academic Publishing, Amsterdam.                                                                                                                                                                                                                                                                                            | Reported in Alin and Johnson (2007)                  |
| Utsumi, M., et al. (1998). Dynamics of dissolved methane and methane oxidation in dimictic Lake Nojiri during winter. <i>Limnology and Oceanography</i> 43(1): 10-17.                                                                                                                                                                                                                                                                                                                       | Reported in Bastviken et al. (2004)                  |
| Utsumi, M., et al. (1998). Oxidation of dissolved methane in a eutrophic, shallow lake: Lake Kasumigaura, Japan. <i>Limnology and Oceanography</i> 43(3): 471-480.                                                                                                                                                                                                                                                                                                                          | Reported in Bastviken et al. (2004)                  |
| Vammen, K., Tercero, J., & Guillén, S. (2006). Evaluación del proceso de eutrofización del lago cocibolca, nicaragua y sus causas en la cuenca. In <i>Eutrophication in South America: causes, consequences and technologies for management and control</i> (p. 25). Retrieved from <a href="http://www.bvsde.org.ni/Web_textos/CIRA/CIRA0018/proceso_de_eutrofizacion_lago_cocibolca.pdf">http://www.bvsde.org.ni/Web_textos/CIRA/CIRA0018/proceso_de_eutrofizacion_lago_cocibolca.pdf</a> | Used for nutrient or chlorophyll data in large lakes |
| Venkiteswaran, J. J. et al. Processes affecting greenhouse gas production in experimental boreal reservoirs. <i>Glob. Biogeochem. Cycles</i> 27, 567–577 (2013).                                                                                                                                                                                                                                                                                                                            | Reported in Deemer et al. (2016)                     |
| Vincent, W. F., Wurtsbaugh, W., Vincent, C. L., & Richerson, P. J. (1984). Seasonal dynamics of nutrient limitation in a tropical high-altitude lake (Lake Titicaca, Peru-Bolivia): Application of physiological bioassays. <i>Limnology and Oceanography</i> , 29(3), 540–552. <a href="http://doi.org/10.4319/lo.1984.29.3.0540">http://doi.org/10.4319/lo.1984.29.3.0540</a>                                                                                                             | Used for nutrient or chlorophyll data in large lakes |
| Wang, F. et al. Carbon dioxide emission from surface water in cascade reservoirs–river system on the Maotiao River, southwest of China. <i>Atmos. Environ.</i> 45, 3827–3834 (2011).                                                                                                                                                                                                                                                                                                        | Reported in Deemer et al. (2016)                     |
| Wang, F. et al. Seasonal variation of CO <sub>2</sub> diffusion flux from a large subtropical reservoir in East China. <i>Atmos. Environ.</i> 103, 129–137 (2015).                                                                                                                                                                                                                                                                                                                          | Reported in Deemer et al. (2016)                     |
| Wang, H. J., et al. (2006). Littoral zones as the hotspots of nitrous oxide (N <sub>2</sub> O) emission in a hyper-eutrophic lake in China. <i>Atmospheric Environment</i> 40(28): 5522-5527.                                                                                                                                                                                                                                                                                               |                                                      |
| Wang, H., Yang, L., Wang, W., Lu, J., & Yin, C. (2007). Nitrous oxide (N <sub>2</sub> O) fluxes and their relationships with water-sediment characteristics in a hyper-eutrophic shallow lake, China. <i>Journal of Geophysical Research: Biogeosciences</i> , 112(1), G01005. <a href="http://doi.org/10.1029/2005JG000129">http://doi.org/10.1029/2005JG000129</a>                                                                                                                        |                                                      |
| Wang, X., et al. (2017). Greenhouse gases concentrations and fluxes from subtropical small reservoirs in relation with watershed urbanization. <i>Atmospheric Environment</i> 154: 225-235.                                                                                                                                                                                                                                                                                                 |                                                      |
| Wang, Y.-H., Huang, H.-H., Chu, C.-P. & Chuag, Y.-J. A preliminary survey of greenhouse gas emission from three reservoirs in Taiwan. <i>Sustain. Environ. Res.</i> 23, 215–225 (2013).                                                                                                                                                                                                                                                                                                     | Reported in Deemer et al. (2016)                     |

| Full Citation for Data Source                                                                                                                                                                                                                                                                                                               | Metadata                                                             |
|---------------------------------------------------------------------------------------------------------------------------------------------------------------------------------------------------------------------------------------------------------------------------------------------------------------------------------------------|----------------------------------------------------------------------|
| Weyhenmeyer, G. A., Kosten, S., Wallin, M. B., Tranvik, L. J., Jeppesen, E., & Roland, F. (2015). Significant fraction of CO <sub>2</sub> emissions from boreal lakes derived from hydrologic inorganic carbon inputs. <i>Nature Geosci</i> , 8(12), 933–939. <a href="http://doi.org/10.1038/NGEO2582">http://doi.org/10.1038/NGEO2582</a> | Was in contact with authors for individual flux and/or variable data |
| Whitfield, C. J., et al. (2011). Controls on greenhouse gas concentrations in polymictic headwater lakes in Ireland. <i>Science of the Total Environment</i> 410-411: 217-225.                                                                                                                                                              |                                                                      |
| Willén, E. (2001). Phytoplankton and water quality characterization: experiences from the Swedish large lakes Mälaren, Hjälmaren, Vättern and Vänern. <i>Ambio</i> , 30(8), 529–537. <a href="http://doi.org/10.1579/0044-7447-30.8.529">http://doi.org/10.1579/0044-7447-30.8.529</a>                                                      | Used for nutrient or chlorophyll data in large lakes                 |
| Wright, S. (1955). <i>Limnological Survey of Western Lake Superior</i> , United States Fish and Wildlife Service, Washington, D.C.                                                                                                                                                                                                          | Reported in Alin and Johnson (2007)                                  |
| Wu, Y. Greenhouse gas flux from newly created marshes in the drawdown area of the Three Gorges Reservoir. (Chongqing University Masters Thesis, 2012).                                                                                                                                                                                      | Reported in Deemer et al. (2016)                                     |
| Xiao, S. et al. Diel and seasonal variation of methane and carbon dioxide fluxes at Site Guojiaba, the Three Gorges Reservoir. <i>J. Environ. Sci.</i> 25, 2065–2071 (2013).                                                                                                                                                                | Reported in Deemer et al. (2016)                                     |
| Yang, H., Andersen, T., Dorsch, P., Tominaga, K., Thrane, J. E., & Hessen, D. O. (2015). Greenhouse gas metabolism in Nordic boreal lakes. <i>Biogeochemistry</i> , 126(1–2), 211–225. <a href="http://doi.org/10.1007/s10533-015-0154-8">http://doi.org/10.1007/s10533-015-0154-8</a>                                                      | Was in contact with authors for individual flux and/or variable data |
| Yang, L. et al. Spatial and seasonal variability of diffusive methane emissions from the Three Gorges Reservoir. <i>J. Geophys. Res. Biogeosciences</i> 118, 471–481 (2013).                                                                                                                                                                | Reported in Deemer et al. (2016)                                     |
| Yu, Y. X. et al. Spatiotemporal characteristics and diffusion flux of partial pressure of dissolved carbon dioxide (pCO <sub>2</sub> ) in Hongjiadu reservoir. <i>Chin. J. Ecol.</i> 27, 1193–1199 (2008).                                                                                                                                  | Reported in Deemer et al. (2016)                                     |
| Yuretich, R. F., and T. E. Cerling (1983). Hydrogeochemistry of Lake Turkana, Kenya: mass balance and mineral reactions in an alkaline lake, <i>Geochimica et Cosmochimica Acta</i> , 47, 1099–1109.                                                                                                                                        | Reported in Alin and Johnson (2007)                                  |
| Zhang, W., & Rao, Y. R. (2012). Application of a eutrophication model for assessing water quality in Lake Winnipeg. <i>Journal of Great Lakes Research</i> , 38(SUPPL. 3), 158–173. <a href="http://doi.org/10.1016/j.jglr.2011.01.003">http://doi.org/10.1016/j.jglr.2011.01.003</a>                                                       | Used for nutrient or chlorophyll data in large lakes                 |
| Zhao, Y. et al. A comparison of methods for the measurement of CO <sub>2</sub> and CH <sub>4</sub> emissions from surface water reservoirs: Results from an international workshop held at Three Gorges Dam, June 2012. <i>Limnol. Oceanogr. Methods</i> 13, 15–29 (2015).                                                                  | Reported in Deemer et al. (2016)                                     |
| Zhao, Y., Wu, B. F. & Zeng, Y. Spatial and temporal patterns of greenhouse gas emissions from Three Gorges Reservoir of China. <i>Biogeosciences</i> 10, 1219–1230 (2013).                                                                                                                                                                  | Reported in Deemer et al. (2016)                                     |

| <b>Full Citation for Data Source</b>                                                                                                                                        | <b>Metadata</b>                  |
|-----------------------------------------------------------------------------------------------------------------------------------------------------------------------------|----------------------------------|
| Zhen, F. Greenhouse gas emission from Three Gorges Reservoir (upper Zhongxian County). (Postdoctoral report in the University of Chinese Academy of Sciences, China, 2012). | Reported in Deemer et al. (2016) |
| Zheng, H. et al. Spatial-temporal variations of methane emissions from the Ertan hydroelectric reservoir in southwest China. <i>Hydrol. Process.</i> 25, 1391–1396 (2011).  | Reported in Deemer et al. (2016) |
| Zhu, D. et al. Nitrous oxide emissions from the surface of the Three Gorges Reservoir. <i>Ecol. Eng.</i> 60, 150–154 (2013).                                                | Reported in Deemer et al. (2016) |







**Table S5.** Univariate and multivariate models used to explain variation in areal emission rates of methane (CH<sub>4</sub>) diffusion, CH<sub>4</sub> ebullition, total CH<sub>4</sub> emission (diffusion + ebullition), carbon dioxide (CO<sub>2</sub>) diffusion, and nitrous oxide (N<sub>2</sub>O) diffusion. Candidate predictor variables are total phosphorus (TP), total nitrogen (TN), chlorophyll a (chl a), and surface area (SA). Multivariate models included SA, one other variable, and their interaction as possible main effects. Statistically significant effects (at p<0.05) are reported in ‘Significant Effects’ column. Coefficient of determination (r<sup>2</sup>), p-value (p), mean absolute error (mae), root mean squared error (rmse), and number of observations (n) are reported for each model. The best model for each gas and emission pathway is highlighted in bold font.

| Dependent Variable                                 | Candidate Predictor Variables                                | Significant Effects                                          | Final Model        |                   |                    |                    |                 |
|----------------------------------------------------|--------------------------------------------------------------|--------------------------------------------------------------|--------------------|-------------------|--------------------|--------------------|-----------------|
|                                                    |                                                              |                                                              | r <sup>2</sup>     | p                 | mae                | rmse               | n               |
| log <sub>10</sub> (CH <sub>4</sub> diffusion + 1)  | log <sub>10</sub> (TP)                                       | log <sub>10</sub> (TP)                                       | 0.021              | 0.00              | 0.463              | 0.544              | 463             |
|                                                    | log <sub>10</sub> (TN)                                       | log <sub>10</sub> (TN)                                       | 0.087              | 0.00              | 0.444              | 0.527              | 380             |
|                                                    | log <sub>10</sub> (Chl a)                                    | log <sub>10</sub> (Chl a)                                    | 0.203              | 0.00              | 0.413              | 0.508              | 424             |
|                                                    | log <sub>10</sub> (SA)                                       | log <sub>10</sub> (SA)                                       | 0.050              | 0.00              | 0.494              | 0.614              | 602             |
|                                                    | log <sub>10</sub> (SA) * log <sub>10</sub> (TP)              | log <sub>10</sub> (SA) + log <sub>10</sub> (TP)              | 0.088              | 0.00              | 0.449              | 0.525              | 463             |
|                                                    | log <sub>10</sub> (SA) * log <sub>10</sub> (TN)              | log <sub>10</sub> (SA) + log <sub>10</sub> (TN)              | 0.166              | 0.00              | 0.419              | 0.504              | 380             |
|                                                    | <b>log<sub>10</sub>(SA) * log<sub>10</sub>(Chl a)</b>        | <b>log<sub>10</sub>(SA) * log<sub>10</sub>(Chl a)</b>        | <b>0.290</b>       | <b>0.00</b>       | <b>0.395</b>       | <b>0.480</b>       | <b>423</b>      |
| log <sub>10</sub> (CH <sub>4</sub> ebullition + 1) | log <sub>10</sub> (TP)                                       | log <sub>10</sub> (TP)                                       | 0.292              | 0.00              | 0.543              | 0.648              | 101             |
|                                                    | log <sub>10</sub> (TN)                                       | log <sub>10</sub> (TN)                                       | 0.311              | 0.00              | 0.519              | 0.647              | 47              |
|                                                    | <b>log<sub>10</sub>(Chl a)</b>                               | <b>log<sub>10</sub>(Chl a)</b>                               | <b>0.317</b>       | <b>0.00</b>       | <b>0.522</b>       | <b>0.630</b>       | <b>65</b>       |
|                                                    | log <sub>10</sub> (SA)                                       | -                                                            | 0.013              | 0.19              | 0.669              | 0.775              | 137             |
|                                                    | log <sub>10</sub> (SA) * log <sub>10</sub> (TP)              | log <sub>10</sub> (TP)                                       | 0.292              | 0.00              | 0.543              | 0.648              | 101             |
|                                                    | <sup>†</sup> log <sub>10</sub> (SA) * log <sub>10</sub> (TN) | <sup>†</sup> log <sub>10</sub> (SA) + log <sub>10</sub> (TN) | <sup>†</sup> 0.387 | <sup>†</sup> 0.00 | <sup>†</sup> 0.486 | <sup>†</sup> 0.610 | <sup>†</sup> 47 |
|                                                    | log <sub>10</sub> (SA) * log <sub>10</sub> (Chl a)           | log <sub>10</sub> (Chl a)                                    | 0.280              | 0.00              | 0.526              | 0.634              | 64              |
| log <sub>10</sub> (CH <sub>4</sub> total + 1)      | log <sub>10</sub> (TP)                                       | log <sub>10</sub> (TP)                                       | 0.221              | 0.00              | 0.469              | 0.572              | 99              |
|                                                    | log <sub>10</sub> (TN)                                       | log <sub>10</sub> (TN)                                       | 0.211              | 0.00              | 0.481              | 0.587              | 47              |
|                                                    | <b>log<sub>10</sub>(Chl a)</b>                               | <b>log<sub>10</sub>(Chl a)</b>                               | <b>0.376</b>       | <b>0.00</b>       | <b>0.453</b>       | <b>0.553</b>       | <b>74</b>       |



|                                          |                                                   |                                                   |              |             |              |              |             |
|------------------------------------------|---------------------------------------------------|---------------------------------------------------|--------------|-------------|--------------|--------------|-------------|
|                                          | log10(SA)                                         | -                                                 | 0.000        | 0.94        | 0.587        | 0.700        | 159         |
|                                          | log10(SA) * log10(TP)                             | log10(TP)                                         | 0.221        | 0.00        | 0.469        | 0.572        | 99          |
|                                          | log10(SA) * log10(TN)                             | log10(SA) + log10(TN)                             | 0.292        | 0.00        | 0.455        | 0.556        | 47          |
|                                          | log10(SA) * log10(Chl $\alpha$ )                  | log10(Chl $\alpha$ )                              | 0.342        | 0.00        | 0.457        | 0.556        | 73          |
|                                          | log10(TP)                                         | log10(TP)                                         | 0.008        | 0.00        | 0.257        | 0.347        | 6907        |
|                                          | log10(TN)                                         | -                                                 | 0.000        | 0.33        | 0.345        | 0.446        | 1932        |
|                                          | log10(Chl $\alpha$ )                              | log10(Chl $\alpha$ )                              | 0.002        | 0.04        | 0.347        | 0.446        | 1812        |
| log10(CO <sub>2</sub> diffusion+ 42.5)   | log10(SA)                                         | log10(SA)                                         | 0.087        | 0.00        | 0.250        | 0.335        | 6899        |
|                                          | <b>log10(SA) * log10(TP)</b>                      | <b>log10(SA) * log10(TP)</b>                      | <b>0.114</b> | <b>0.00</b> | <b>0.239</b> | <b>0.326</b> | <b>6716</b> |
|                                          | log10(SA) * log10(TN)                             | log10(SA) + log10(TN)                             | 0.014        | 0.00        | 0.343        | 0.444        | 1762        |
|                                          | log10(SA) * log10(Chl $\alpha$ )                  | log10(SA) + log10(Chl $\alpha$ )                  | 0.008        | 0.00        | 0.346        | 0.442        | 1577        |
|                                          | log10(TP)                                         | -                                                 | 0.000        | 0.87        | 0.143        | 0.205        | 262         |
|                                          | log10(TN)                                         | log10(TN)                                         | 0.016        | 0.05        | 0.139        | 0.202        | 246         |
|                                          | log10(Chl $\alpha$ )                              | log10(Chl $\alpha$ )                              | 0.062        | 0.00        | 0.138        | 0.201        | 268         |
| log10(N <sub>2</sub> O diffusion + 0.25) | log10(SA)                                         | log10(SA)                                         | 0.041        | 0.00        | 0.151        | 0.231        | 330         |
|                                          | log10(SA) * log10(TP)                             | log10(SA)                                         | 0.057        | 0.00        | 0.135        | 0.199        | 262         |
|                                          | log10(SA) * log10(TN)                             | log10(SA) + log10(TN)                             | 0.066        | 0.00        | 0.132        | 0.196        | 246         |
|                                          | <b>log10(SA) * log10(Chl <math>\alpha</math>)</b> | <b>log10(SA) + log10(Chl <math>\alpha</math>)</b> | <b>0.090</b> | <b>0.00</b> | <b>0.135</b> | <b>0.198</b> | <b>268</b>  |

<sup>†</sup>Although the log10(SA) \* log10(TN) model best explained variation in the ebullitive CH<sub>4</sub> flux, it was not chosen as the best model because all observations came from a single study (Rinta et al. 2017).

**Table S6.** Term coefficients, standard errors (SE) and p values for the best size-productivity weighted (SPW) models for carbon dioxide (CO<sub>2</sub>; mg C m<sup>-2</sup> d<sup>-1</sup>), methane (CH<sub>4</sub>; mg C m<sup>-2</sup> d<sup>-1</sup>), and nitrous oxide (N<sub>2</sub>O; mg N m<sup>-2</sup> d<sup>-1</sup>) emission rates. Model terms include total phosphorus (TP; µg L<sup>-1</sup>), chlorophyll a (chla; µg L<sup>-1</sup>), and surface area (SA; km<sup>2</sup>).

| Dependent Variable                                 | Model Term                                       | Coefficient | SE    | p          |
|----------------------------------------------------|--------------------------------------------------|-------------|-------|------------|
| log <sub>10</sub> (CO <sub>2</sub> + 43)           | Intercept                                        | 2.447       | 0.011 | < 2.00E-16 |
|                                                    | log <sub>10</sub> (SA)                           | -0.034      | 0.011 | 1.32E-03   |
|                                                    | log <sub>10</sub> (TP)                           | 0.080       | 0.009 | 2.32E-17   |
|                                                    | log <sub>10</sub> (SA):log <sub>10</sub> (TP)    | -0.072      | 0.009 | 4.51E-16   |
| log <sub>10</sub> (diffusive CH <sub>4</sub> + 1)  | Intercept                                        | 0.705       | 0.029 | 1.27E-80   |
|                                                    | log <sub>10</sub> (SA)                           | -0.167      | 0.024 | 7.39E-12   |
|                                                    | log <sub>10</sub> (chla)                         | 0.530       | 0.047 | 1.57E-25   |
|                                                    | log <sub>10</sub> (SA): log <sub>10</sub> (chla) | 0.098       | 0.042 | 1.93E-02   |
| log <sub>10</sub> (ebullitive CH <sub>4</sub> + 1) | Intercept                                        | 0.758       | 0.150 | 3.82E-06   |
|                                                    | log <sub>10</sub> (chla)                         | 0.752       | 0.139 | 1.06E-06   |
| log <sub>10</sub> (total CH <sub>4</sub> + 1)      | Intercept                                        | 0.940       | 0.122 | 5.87E-11   |
|                                                    | log <sub>10</sub> (chla)                         | 0.778       | 0.118 | 6.50E-09   |
| log <sub>10</sub> (N <sub>2</sub> O + 0.25)        | Intercept                                        | -0.505      | 0.014 | 5.59E-104  |
|                                                    | log <sub>10</sub> (SA)                           | 0.030       | 0.011 | 5.23E-03   |
|                                                    | log <sub>10</sub> (chla)                         | 0.104       | 0.030 | 5.88E-04   |

**Table S7.** Global carbon emissions in CO<sub>2</sub> equivalents (Pg C-CO<sub>2</sub>eq/yr for each GHG) from lakes and impoundments and individual contributions to total radiative forcing from aquatic water bodies. Calculations are shown for the current global chl<sub>a</sub> distribution as well as scenarios of generalized increases in 1, 5, and 10 µg/L. These represent small-moderate increases in global eutrophication.

| Lake Size Distribution        | Chl <sub>a</sub> Scenario | Size-Productivity Weighted | CO <sub>2</sub> (%) | CH <sub>4</sub> (%) | N <sub>2</sub> O (%) |
|-------------------------------|---------------------------|----------------------------|---------------------|---------------------|----------------------|
| <b>Downing et al. 2006</b>    | Current                   | 1.9                        | 26.1                | 71.8                | 2.0                  |
|                               | + 1 µg L <sup>-1</sup>    | 2.0                        | 25.2                | 72.8                | 2.0                  |
|                               | + 5 µg L <sup>-1</sup>    | 2.4                        | 22.4                | 75.7                | 1.9                  |
|                               | + 10 µg L <sup>-1</sup>   | 2.7                        | 19.9                | 78.3                | 1.8                  |
| <b>Verpoorter et al. 2014</b> | Current                   | 2.3                        | 22.9                | 75.0                | 2.1                  |
|                               | + 1 µg L <sup>-1</sup>    | 2.4                        | 22.0                | 75.9                | 2.1                  |
|                               | + 5 µg L <sup>-1</sup>    | 2.8                        | 19.4                | 78.7                | 2.0                  |
|                               | + 10 µg L <sup>-1</sup>   | 3.2                        | 17.1                | 81.1                | 1.8                  |
| <b>Messenger et al. 2016</b>  | Current                   | 1.3                        | 19.6                | 77.8                | 2.6                  |
|                               | + 1 µg L <sup>-1</sup>    | 1.3                        | 18.7                | 78.8                | 2.6                  |
|                               | + 5 µg L <sup>-1</sup>    | 1.5                        | 16.0                | 81.6                | 2.4                  |
|                               | + 10 µg L <sup>-1</sup>   | 1.8                        | 13.8                | 84.0                | 2.2                  |

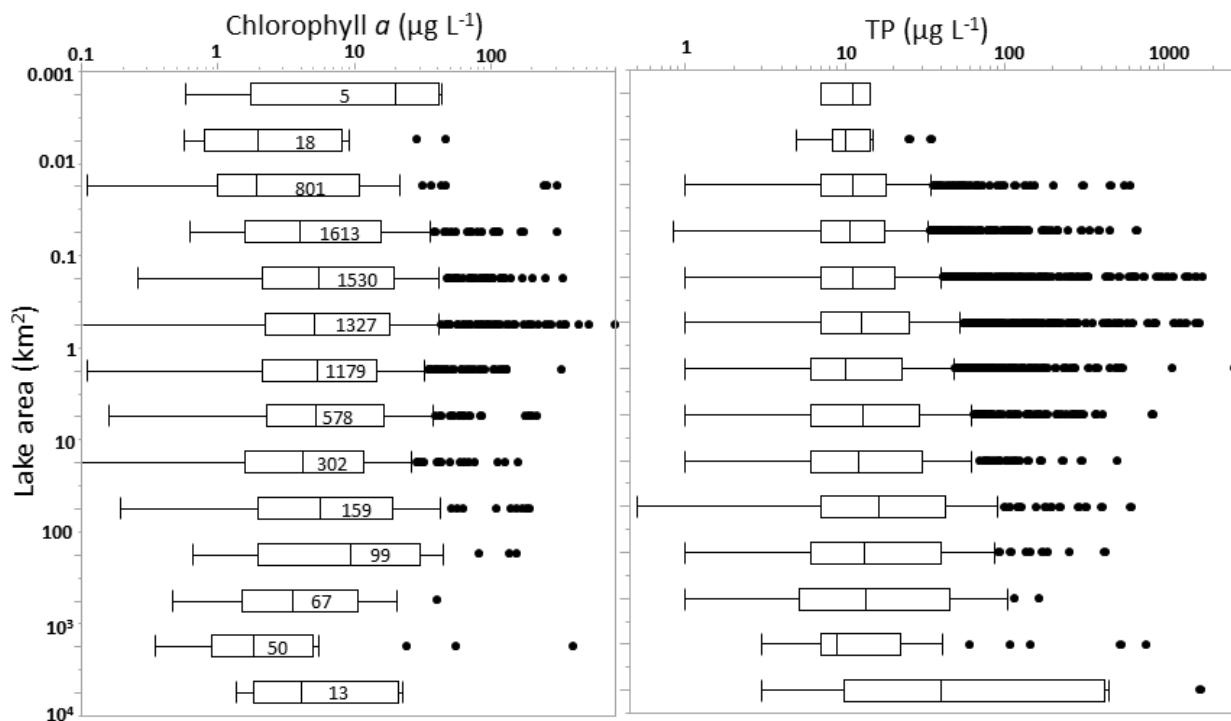

**Figure S1. (Left)** Boxplots of chla binned according to lake area, except for lakes of the two largest bin size classes. The box outlines the 1<sup>st</sup> and 3<sup>rd</sup> quartiles, the line within the box is the median, whiskers are maximum and minimum values and outliers are shown as black dots. Numbers in boxes are sample size. **(Right)** Boxplots of total phosphorus (TP) according to lake area, except for lakes of the two largest size classes. Sample sizes of chla bins on left correspond to TP boxplots as well. No significant relationship was found between chlorophyll and surface area ( $r^2=0.0006$ ,  $p=0.2503$ ) and a significant but extremely weak positive relationship was found between TP and surface area ( $r^2=0.007$ ,  $p<0.0001$ ). Because lake size accounted for so little variation in chla or TP we felt justified in assigning chlorophyll frequency distributions over all but the largest two size categories of lakes, for which we entered true concentrations.

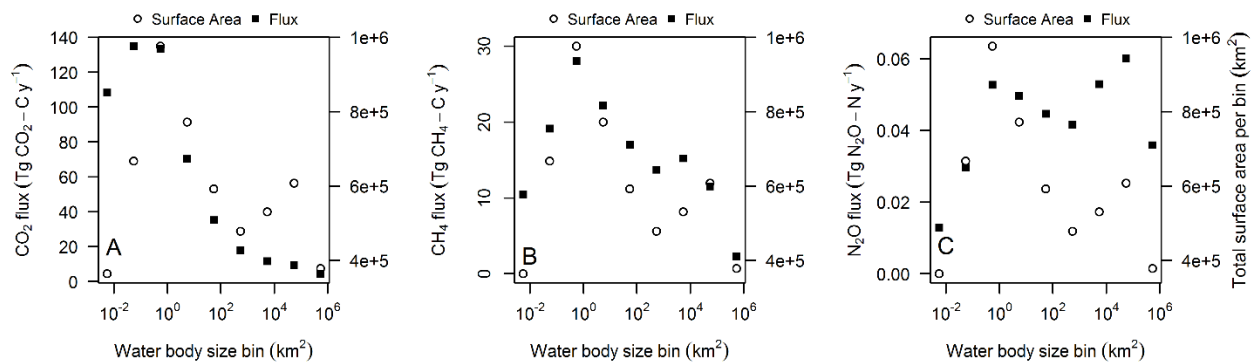

**Figure S2** - Annual emissions (Tg Gas  $y^{-1}$ ) per lake size bin according to the Verpoorter et al. (2014) distribution using the size-productivity weighted approach for A) the CO $_2$  data, B) the total CH $_4$  dataset, and C) N $_2$ O.

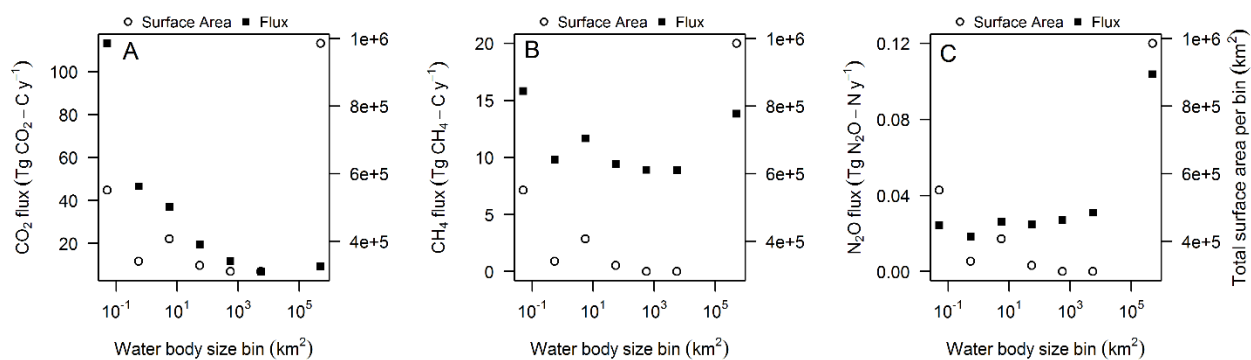

**Figure S3** - Annual emissions (Tg Gas  $y^{-1}$ ) per lake size bin according to the Messenger et al. (2016) distribution using the size-productivity weighted approach for A) the CO $_2$  data, B) the total CH $_4$  dataset, and C) N $_2$ O.
